# Supplementary material
Source: PubMed Central journal article supplement (PMC3020765)
Supplement: supp_M110.144006_jbc.M110.144006-1.pdf [file supp_M110.144006_jbc.M110.144006-1.pdf]

**Supplemental Table S1. The sequences of the primers used in the DNA construction.**

| Constructs                                           | DNA sequence                                                                                      |
|------------------------------------------------------|---------------------------------------------------------------------------------------------------|
| SPN48 (residues 17 – 389)                            | 5' -CCCCATATGGAAGATGCGACTTTGCAAGA- 3'<br>5' -CCCAAGCTTTCAATTCAATGTTGTGACTCGT- 3'                  |
| SPN48 (E353K) internal primers                       | 5' -GTTATTTTACCAAAGATGGCACT- 3'<br>5' -AGTGCCATCTTTGGTAAAATAAC- 3'                                |
| SPN48 4KA (K293A/K294A/K297A/K298A) internal primers | 5' -TTCGCGGCAGTGTTGGCGGCATTAGGGGTGAAGAAAGCG- 3'<br>5' -CCCTAATGCCGCCAACACTGCCGCGAAGTCAACAGTAC- 3' |
| SPN48 RCL (residues 336 – 361)                       | 5' -GGGGGATCCGAAGAGGGTGTAGAGGCC- 3'<br>5' -GGGGAATTCCCTTAGGACTGTCCGGAAG- 3'                       |
| SPE clip domain (residues 19 – 84)                   | 5' -TTTGAATTCTTGACCCCTGCCGAAGCCCGA- 3'<br>5' -TTTCTCGAGCACATTGTTGAACTCTGGGGGCCCGTC- 3'            |
| SPE serine protease domain (residues 85 – 385)       | 5' -CCCGAATTCCCATCAAACCCCAATAGTGGAC- 3'<br>5' -TAACTCGAGCTAGGGCTTCAGCTTGCCGACG- 3'                |
